# Supplementary material for: Dose-related liver injury of Geniposide associated with the alteration in bile acid synthesis and transportation
Source: PubMed Central journal article supplement (PMC5566417; doi:10.1038/s41598-017-09131-2), 2017-08-21
Supplement: 41598_2017_9131_MOESM1_ESM.pdf [file 41598_2017_9131_MOESM1_ESM.pdf]

**Dose-related liver injury of Geniposide associated with the  
alteration in bile acid synthesis and transportation**

JingzhuoTian<sup>1#</sup>, Jingjing Zhu<sup>1#</sup>, Yan Yi<sup>1#</sup>, Chunying Li<sup>1</sup>, Yushi Zhang<sup>1</sup>, Yong Zhao<sup>1</sup>,  
Chen Pan<sup>1</sup>, Shixie Xiang<sup>1</sup>, Xiaolong Li<sup>1</sup>,Guiqin Li<sup>1</sup>, John W Newman<sup>2,3,4</sup>, Xiaoyi  
Feng<sup>1</sup>, Jing Liu<sup>1</sup>, Jiayin Han<sup>1</sup>, Lianmei Wang<sup>1</sup>, Yue Gao<sup>5</sup>, Michael R. La Frano<sup>2,6</sup>,  
Aihua Liang<sup>1\*</sup>

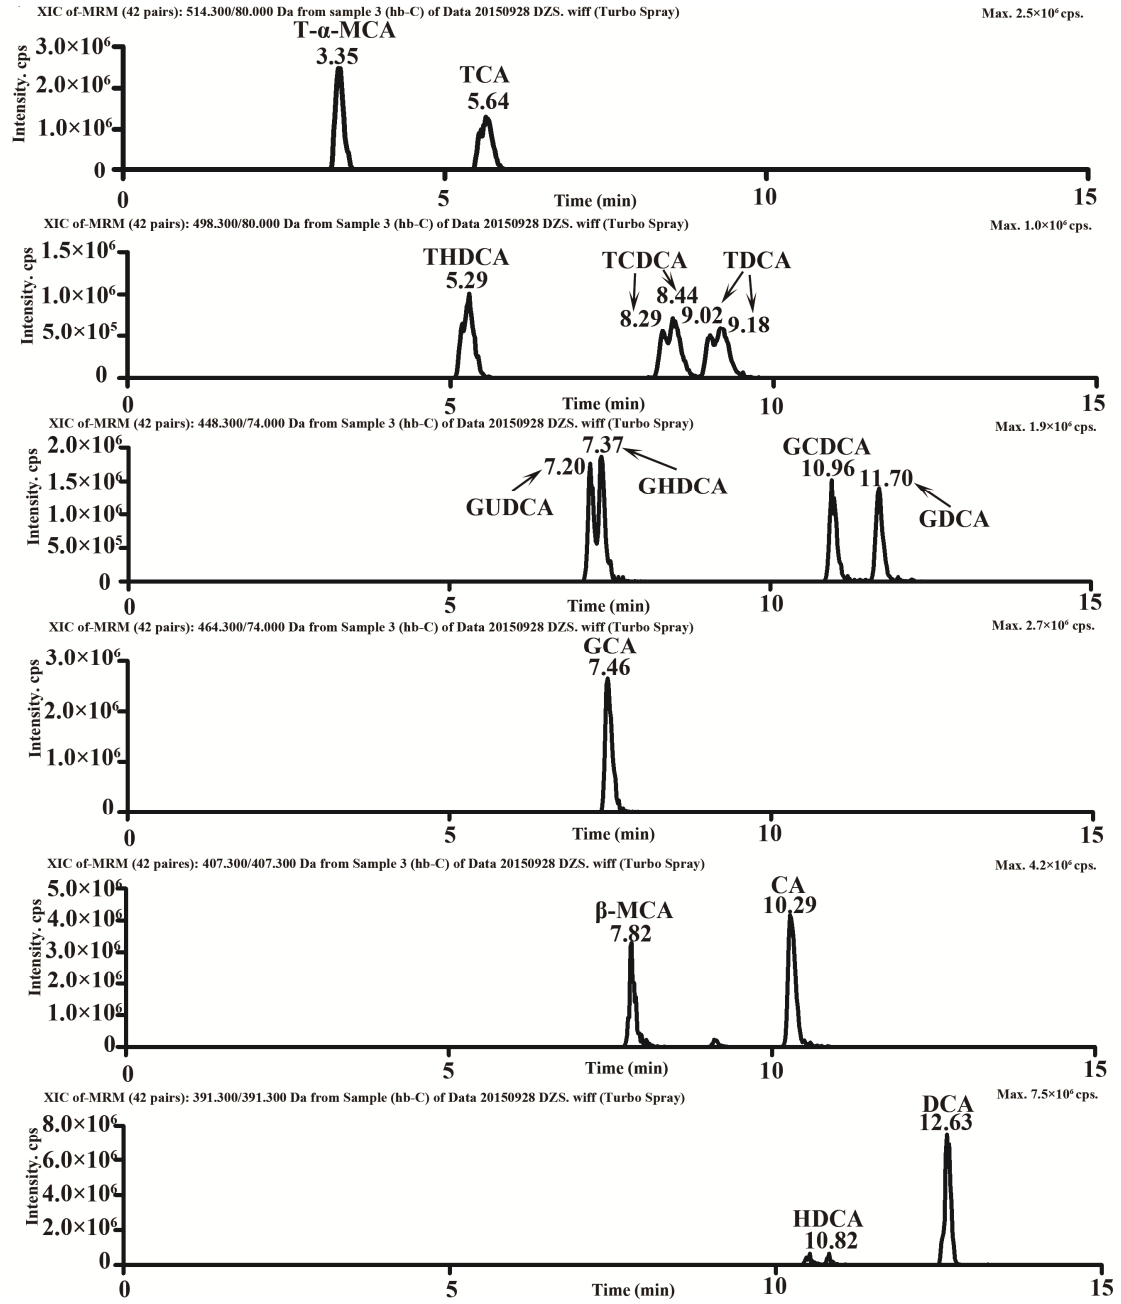

Supplementary Figure S1

Representative UPLC-MS/MS chromatogram authentic standard of bile acids.

### Supplementary Table S1

Results of the correlation analysis consist of correlation coefficient.

| Bile acid        | ALP (serum) |                      | $\gamma$ -GT (serum) |                     | ALP (liver) |                      | $\gamma$ -GT (liver) |                      |
|------------------|-------------|----------------------|----------------------|---------------------|-------------|----------------------|----------------------|----------------------|
|                  | <i>r</i>    | <i>p</i>             | <i>r</i>             | <i>p</i>            | <i>r</i>    | <i>p</i>             | <i>r</i>             | <i>p</i>             |
| T- $\alpha$ -MCA | 0.638       | 0.000 <sup>***</sup> | 0.533                | 0.002 <sup>**</sup> | 0.523       | 0.003 <sup>**</sup>  | 0.366                | 0.043 <sup>*</sup>   |
| TCDCa            | 0.667       | 0.000 <sup>***</sup> | 0.569                | 0.001 <sup>**</sup> | 0.838       | 0.000 <sup>***</sup> | 0.676                | 0.000 <sup>***</sup> |
| TCA              | 0.633       | 0.000 <sup>***</sup> | 0.534                | 0.002 <sup>**</sup> | 0.659       | 0.000 <sup>***</sup> | 0.436                | 0.014 <sup>*</sup>   |
| THDCA            | 0.296       | 0.106                | 0.264                | 0.151               | -0.183      | 0.324                | -0.208               | 0.261                |
| TDCA             | 0.492       | 0.005 <sup>**</sup>  | 0.379                | 0.035 <sup>*</sup>  | -0.036      | 0.848                | -0.203               | 0.274                |
| GCA              | 0.394       | 0.028 <sup>*</sup>   | 0.368                | 0.042 <sup>*</sup>  | 0.187       | 0.315                | 0.112                | 0.549                |
| HDCA             | -0.123      | 0.510                | -0.164               | 0.379               | -0.047      | 0.800                | -0.272               | 0.139                |
| $\beta$ -MCA     | 0.698       | 0.000 <sup>***</sup> | 0.475                | 0.007 <sup>**</sup> | 0.312       | 0.113                | -0.083               | 0.680                |
| CA               | 0.693       | 0.000 <sup>***</sup> | 0.535                | 0.002 <sup>**</sup> | 0.714       | 0.000 <sup>***</sup> | 0.451                | 0.011 <sup>*</sup>   |
| CDCA             | 0.396       | 0.027 <sup>*</sup>   | 0.364                | 0.044 <sup>*</sup>  | 0.439       | 0.014 <sup>*</sup>   | 0.290                | 0.113                |
| DCA              | 0.163       | 0.380                | 0.113                | 0.544               | —           | —                    | —                    | —                    |

*r*: person correlation coefficient

\* $P < 0.05$ , \*\* $P < 0.01$ , \*\*\* $P < 0.001$ , compared with the control group.

## Supplementary Table S2

The MRM acquisition parameters of bile acids and internal standards

| Compounds        | Parent ion<br>(m/z) | Daughter ion<br>(m/z) | DP<br>(V) | CE<br>(V) |
|------------------|---------------------|-----------------------|-----------|-----------|
| $\beta$ -MCA     | 407.3               | 407.3                 | 115       | 30        |
| CA               | 407.3               | 407.3                 | 125       | 30        |
| UDCA             | 391.3               | 391.3                 | 125       | 30        |
| HDCA             | 391.3               | 391.3                 | 125       | 30        |
| CDCA             | 391.3               | 391.3                 | 130       | 30        |
| DCA              | 391.3               | 391.3                 | 130       | 30        |
| LCA              | 375.3               | 375.3                 | 130       | 35        |
| T- $\alpha$ -MCA | 514.3               | 80.0                  | 155       | 110       |
| THDCA            | 498.3               | 80.0                  | 145       | 110       |
| TCA              | 514.3               | 80.0                  | 185       | 115       |
| TCDC             | 498.3               | 80.0                  | 145       | 110       |
| TDCA             | 498.3               | 80.0                  | 140       | 110       |
| GUDCA            | 448.3               | 74.0                  | 115       | 70        |
| GHDCA            | 448.3               | 74.0                  | 120       | 70        |
| GCA              | 464.3               | 74.0                  | 125       | 70        |
| GCDCA            | 448.3               | 74.0                  | 125       | 65        |
| GDCA             | 448.3               | 74.0                  | 125       | 65        |
| CUDA             | 341.3               | 216.2                 | 65        | 35        |

The MRM acquisition parameters of bile acids and internal standards including Q1, Q3, declustering potential (DP) and collision energies (CE) were showed.

### Supplementary Table S3

Linearity Data and Quantitation Ranges Obtained for Bile acids

| Bile acids       | linearity              | Correlation coefficient (R) | Range (nM/L)     | LOD (nM/L) |
|------------------|------------------------|-----------------------------|------------------|------------|
| $\beta$ -MCA     | $y = 0.242x + 2.5985$  | 0.9999                      | 1.1102~3700.7122 | 0.7091     |
| CA               | $y = 0.5622x + 24.854$ | 0.9993                      | 0.7807~8674.4010 | 0.7203     |
| UDCA             | $y = 0.1811x + 1.1484$ | 0.9977                      | 0.4979~1659.8314 | 0.3910     |
| HDCA             | $y = 0.108x + 6.8202$  | 0.9991                      | 0.8021~8912.0412 | 0.5539     |
| CDCA             | $y = 0.1711x + 3.1875$ | 1                           | 0.3460~3843.9005 | 0.1990     |
| DCA              | $y = 0.5679x + 18.012$ | 0.9989                      | 0.3439~3820.9746 | 0.2793     |
| LCA              | $y = 0.0206x + 2.2645$ | 0.9984                      | 0.8398~9331.5984 | 0.8398     |
| T- $\alpha$ -MCA | $y = 0.1368x + 3.1354$ | 0.9995                      | 1.4917~4972.3404 | 1.4689     |
| THDCA            | $y = 0.2012x + 1.0175$ | 0.9999                      | 0.6062~2020.7403 | 0.5885     |
| TCA              | $y = 0.1428x - 0.7775$ | 0.999                       | 1.7613~2935.4276 | 1.2325     |
| TCDCA            | $y = 0.2114x + 0.9555$ | 0.9997                      | 0.6082~2027.3503 | 0.5768     |
| TDCA             | $y = 0.6199x - 0.5963$ | 0.999                       | 0.3452~575.2842  | 0.3024     |
| GUDCA            | $y = 0.2132x - 0.9757$ | 0.9971                      | 0.7009~1168.1197 | 0.5156     |
| GHDCA            | $y = 0.268x - 0.0535$  | 0.9999                      | 0.7041~1173.4909 | 0.3388     |
| GCA              | $y = 0.17x + 0.2256$   | 0.9999                      | 1.9631~3271.7667 | 0.8608     |
| GCDCA            | $y = 0.2152x - 1.1602$ | 0.999                       | 0.6719~1119.8872 | 0.5714     |
| GDCA             | $y = 0.183x - 0.8729$  | 0.9978                      | 0.4027~671.2335  | 0.3678     |

### Supplementary Table S4

Concentrations and recoveries of bile acids in sera after rats treated with Geniposide for 3 days.

| Bile acids       | Concentration (ng/ml) | Recovery (%)    | Bile acid | Concentration (ng/ml) | Recovery (%)    |
|------------------|-----------------------|-----------------|-----------|-----------------------|-----------------|
| $\beta$ -MCA     | 9800                  | 76.7 $\pm$ 0.1  | TCA       | 9997                  | 55.1 $\pm$ 0.1  |
|                  | 98                    | 97.0 $\pm$ 0.1  |           | 99.97                 | 60.6 $\pm$ 0.4  |
| CA               | 10040                 | 85.6 $\pm$ 0.3  | TCDCA     | 5004                  | 54.4 $\pm$ 0.1  |
|                  | 100.4                 | 79.8 $\pm$ 0.1  |           | 50.04                 | 69.4 $\pm$ 0.4  |
| UDCA             | 10008                 | 71.3 $\pm$ 0.1  | TDCA      | 10020                 | 66.8 $\pm$ 0.1  |
|                  | 100.8                 | 77.1 $\pm$ 0.2  |           | 100.0                 | 87.5 $\pm$ 0.2  |
| HDCA             | 5010                  | 91.4 $\pm$ 0.2  | GUDCA     | 9980                  | 79.1 $\pm$ 0.2  |
|                  | 50.1                  | 81.8 $\pm$ 0.2  |           | 99.8                  | 48.1 $\pm$ 0.4  |
| CDCA             | 5010                  | 86.8 $\pm$ 0.3  | GHDCA     | 9960                  | 104.0 $\pm$ 0.1 |
|                  | 50.1                  | 103.4 $\pm$ 0.1 |           | 99.6                  | 90.4 $\pm$ 0.2  |
| DCA              | 5000                  | 92.6 $\pm$ 0.1  | GCA       | 10020                 | 98.4 $\pm$ 0.1  |
|                  | 50                    | 106.1 $\pm$ 0.1 |           | 100.02                | 98.9 $\pm$ 0.1  |
| T- $\alpha$ -MCA | 9996                  | 74.3 $\pm$ 0.1  | GCDCA     | 5020                  | 99.6 $\pm$ 0.2  |
|                  | 99.6                  | 76.2 $\pm$ 0.4  |           | 50.2                  | 88.8 $\pm$ 0.1  |
| THDCA            | 9996                  | 72.4 $\pm$ 0.1  | GDCA      | 9989                  | 102.7 $\pm$ 0.1 |
|                  | 98.96                 | 75.6 $\pm$ 0.1  |           | 99.89                 | 88.6 $\pm$ 0.1  |

Method performance was evaluated by analysis of carbon-stripped serum spikes at low and high concentrations.

### Supplementary Table S5

PCR for the subsequent genes with the corresponding primers.

| Gene   | Primer                                     |
|--------|--------------------------------------------|
| FXR    | Forward: 5'-CAGCAGACCCTCCTGGATTA-3'        |
|        | Reverse: 5'-TCTTCGTGGTCCAGTGTCTG-3'        |
| SHP    | Forward: 5'-CCTTGGATGTCCTAGGCAAG-3'        |
|        | Reverse: 5'-CACCCTGTTGGGTTCCCTCT-3'        |
| CYP7A1 | Forward: 5'-TGCCTTCTGTTACCGAGTGATGTT-3'    |
|        | Reverse: 5'-ACCGGCAGGTCATTCAGTTGCACT-3'    |
| BSEP   | Forward: 5'-TCTATGGACTCTGCTTTGCCTTTT-3'    |
|        | Reverse: 5'-GCCCAGACCTTCGTAGGCTA-3'        |
| NTCP   | Forward: 5'-CCCTGATGCCCTTCTCTGG-3'         |
|        | Reverse: 5'-GAATCCTGTTTCCATGCTGATG-3'      |
| Mrp2   | Forward: 5'-TGGAGTTGGCTCACCTCAGATC-3'      |
|        | Reverse: 5'-CTAGAGCTCTGTGTGATTACATTTTCA-3' |
| Mrp3   | Forward: 5'-GTGCTGAAGAATTTGACTCTG-3'       |
|        | Reverse: 5'-GACCAGGACCCGGTTGTAGTC-3'       |
| GAPDH  | Forward: 5'-CCTGGAGAAACCTGCCAAGTAT-3'      |
|        | Reverse: 5'-AGCCAGGATGCC TTAGT-3'          |
